# Supplementary material
Source: publisher figshare collection journal article supplement (https://adisjournals.figshare.com/ndownloader/files/38527508)
Supplement: Supplementary file 1 [file 38527508]

# Novel Therapies in Plaque Psoriasis: A Review of Tyrosine Kinase 2 Inhibitors

George Martin, MD

Chronic inflammation in plaque psoriasis is driven by interleukin (IL)-17-producing cells, under the regulation of IL-23.

Tyrosine kinase 2 (**TYK2**), a Janus kinase (JAK) family member, mediates signaling by IL-23 and thus is a potential target for the treatment of psoriasis and psoriatic arthritis.

Three oral **TYK2 inhibitors** are approved or in development for psoriasis and psoriatic arthritis: **deucravacitinib**, which is approved in the US for the treatment of adults with moderate to severe plaque psoriasis who are candidates for systemic therapy or phototherapy, **brepocitinib**, and **ropsacitinib**.

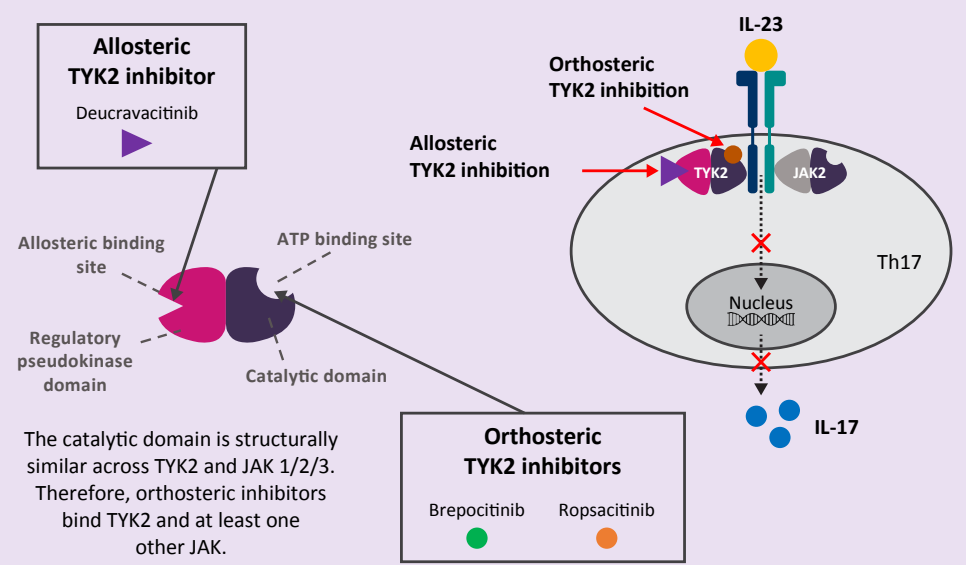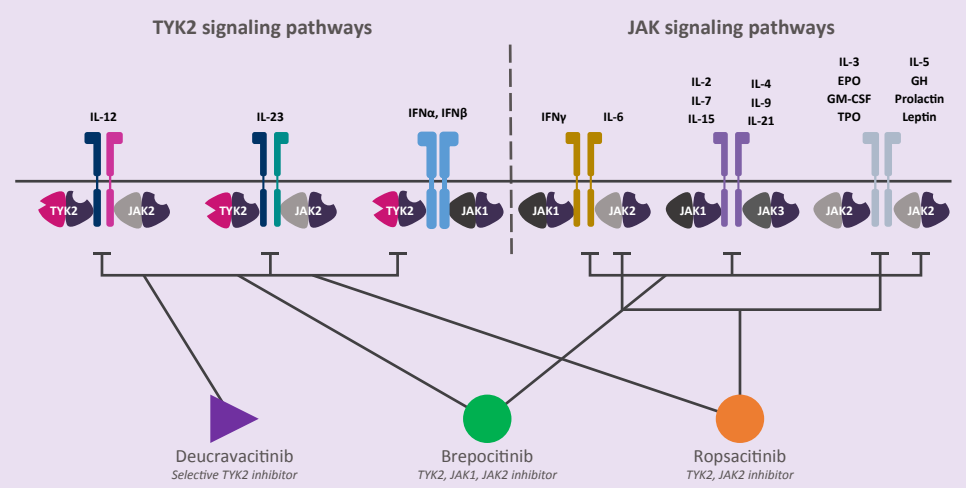

The selectivity of allosteric TYK2 inhibition may explain the improved safety profile of deucravacitinib versus orthosteric JAK and TYK2 inhibitors.
